# Supplementary material for: Accuracy and Efficiency of Right-Lobe Graft Weight Estimation Using Deep-Learning-Assisted CT Volumetry for Living-Donor Liver Transplantation
Source: MDPI journal article supplement (doi:10.3390/diagnostics12030590), 2022-02-25
Supplement: s1 [file s1]

**Table S1. CT imaging techniques used in the development and validation groups.**

| <b>CT Techniques (N, %)</b>          | <b>Total</b> | <b>Developmental Group</b> | <b>Validation Group</b> |
|--------------------------------------|--------------|----------------------------|-------------------------|
| No. of patients                      | 581          | 207                        | 374                     |
| CT detector configuration (channels) |              |                            |                         |
| 16                                   | 105 (18.1%)  | 58 (28.0%)                 | 47 (12.6%)              |
| 64                                   | 62 (10.7%)   | 21 (10.1%)                 | 41 (11.0%)              |
| 128                                  | 414 (71.3%)  | 128 (61.8%)                | 286 (76.5%)             |
| Tube voltage (kVp)                   |              |                            |                         |
| 100                                  | 573 (98.6%)  | 206 (99.5%)                | 367 (98.1%)             |
| 120                                  | 8 (1.4%)     | 1 (0.5%)                   | 7 (1.9%)                |
| Slice thickness                      |              |                            |                         |
| 3 mm                                 | 25 (4.3%)    | 3 (1.4%)                   | 22 (5.9%)               |
| 5 mm                                 | 556 (95.7%)  | 204 (98.6%)                | 352 (94.1%)             |
| CT vendors                           |              |                            |                         |
| GE                                   | 7 (1.2%)     | 0 (0.0%)                   | 7 (1.9%)                |
| Siemens                              | 574 (98.8%)  | 207 (100.0%)               | 367 (98.1%)             |

Data are shown as the number of patients and percentages.
